# Supplementary material for: Integrated Metabolomics and Volatolomics for Comparative Evaluation of Fermented Soy Products
Source: MDPI journal article supplement (doi:10.3390/foods10112516), 2021-10-20
Supplement: s1 [file s1]

| Brand            | Location                            | Sample |    |    |    | Fermentation period |          |            |              |
|------------------|-------------------------------------|--------|----|----|----|---------------------|----------|------------|--------------|
|                  |                                     | S      | C  | M  | D  | S                   | C        | M          | D            |
| Mygol (1)        | Jinan-gun, Jeollabuk-do, Korea      | S1     | C1 | M1 | D1 | X                   | -        | -          | -            |
| Oseak (2)        | Yangyang-gun, Gangwon-do, Korea     | S2     | C2 | M2 | D2 | X                   | 2-3 days | 40-50 days | over 2 years |
| Seoil (3)        | Anseong-si, Gyeonggi-do, Korea      | S3     | C3 | M3 | D3 | X                   | 36 hours | -          | over 2 years |
| Yisak garden (4) | Gongju-si, Chungcheongnam-do, Korea | S4     | C4 | M4 | D4 | X                   | 2-3 days | 50 days    | 3 years      |
| Sangchon (5)     | Yongin-si, Gyeonggi-do, Korea       | S5     | C5 | M5 | D5 | X                   | -        | 20 days    | over 1 year  |

**Table S1** The information of soy(S), cheonggukjang(C), meju(M), doenjang(D) sample.

| sample | before<br>extract<br>(mg) | after<br>extract<br>(mg) | extraction<br>yield |
|--------|---------------------------|--------------------------|---------------------|
| S1-1   | 200.5                     | 17.79                    | 0.08872818          |
| S1-2   | 200.2                     | 10.34                    | 0.051648352         |
| S1-3   | 200.41                    | 10.24                    | 0.051095255         |
| S2-1   | 200.1                     | 11.51                    | 0.057521239         |
| S2-2   | 200.5                     | 11.23                    | 0.056009975         |
| S2-3   | 200.07                    | 12.87                    | 0.064327485         |
| S3-1   | 200.6                     | 12.09                    | 0.060269192         |
| S3-2   | 200.4                     | 13.03                    | 0.06501996          |
| S3-3   | 200.6                     | 11                       | 0.054835494         |
| S4-1   | 200.7                     | 11.84                    | 0.058993523         |
| S4-2   | 199.2                     | 11.24                    | 0.056425703         |
| S4-3   | 199.57                    | 10.45                    | 0.05236258          |
| S5-1   | 199.7                     | 11.75                    | 0.058838257         |
| S5-2   | 200                       | 13.02                    | 0.0651              |
| S5-3   | 199.91                    | 12.06                    | 0.060327147         |
| C1-1   | 199.68                    | 21.69                    | 0.108623798         |
| C1-2   | 200.41                    | 24.88                    | 0.124145502         |
| C1-3   | 200.41                    | 21.77                    | 0.108627314         |
| C2-1   | 200.33                    | 38.65                    | 0.192931663         |
| C2-2   | 200.07                    | 35.82                    | 0.179037337         |
| C2-3   | 200.07                    | 48.95                    | 0.244664367         |
| C3-1   | 199.5                     | 24.73                    | 0.1239599           |
| C3-2   | 200.6                     | 25                       | 0.124626122         |
| C3-3   | 200.6                     | 24.2                     | 0.120638086         |
| C4-1   | 200.06                    | 30.81                    | 0.154003799         |
| C4-2   | 199.57                    | 31.18                    | 0.156235907         |

| sample | before<br>extract<br>(mg) | after<br>extract<br>(mg) | extraction<br>yield |
|--------|---------------------------|--------------------------|---------------------|
| M1-1   | 200                       | 20.45                    | 0.10225             |
| M1-2   | 200.4                     | 22.01                    | 0.109830339         |
| M1-3   | 200.4                     | 24.5                     | 0.122255489         |
| M2-1   | 200.7                     | 7.91                     | 0.039412058         |
| M2-2   | 200.2                     | 7.79                     | 0.038911089         |
| M2-3   | 200.2                     | 8.01                     | 0.04000999          |
| M3-1   | 199.4                     | 7.69                     | 0.038565697         |
| M3-2   | 199.5                     | 18.1                     | 0.090726817         |
| M3-3   | 199.5                     | 7.99                     | 0.040050125         |
| M4-1   | 199.4                     | 8.31                     | 0.041675025         |
| M4-2   | 199.8                     | 8.85                     | 0.044294294         |
| M4-3   | 199.8                     | 8.29                     | 0.041491491         |
| M5-1   | 200                       | 16.38                    | 0.0819              |
| M5-2   | 199.7                     | 14.8                     | 0.074111167         |
| M5-3   | 199.7                     | 16.83                    | 0.084276415         |
| D1-1   | 199.97                    | 67.59                    | 0.3380007           |
| D1-2   | 199.27                    | 62.59                    | 0.314096452         |
| D1-3   | 199.27                    | 62.11                    | 0.31168766          |
| D2-1   | 199.38                    | 63.77                    | 0.319841509         |
| D2-2   | 199.81                    | 62.92                    | 0.314899154         |
| D2-3   | 199.81                    | 64.08                    | 0.320704669         |
| D3-1   | 200.21                    | 63.67                    | 0.318016083         |
| D3-2   | 199.04                    | 62.88                    | 0.315916399         |
| D3-3   | 199.04                    | 56.7                     | 0.284867363         |
| D4-1   | 200.13                    | 63.56                    | 0.317593564         |
| D4-2   | 200.59                    | 64.74                    | 0.322747894         |

|      |        |       |             |      |        |       |             |
|------|--------|-------|-------------|------|--------|-------|-------------|
| C4-3 | 199.57 | 30.09 | 0.150774164 | D4-3 | 200.59 | 66.2  | 0.330026422 |
| C5-1 | 199.32 | 21.88 | 0.109773229 | D5-1 | 200.42 | 65.48 | 0.326713901 |
| C5-2 | 199.91 | 22.19 | 0.11099995  | D5-2 | 199.91 | 64.25 | 0.321394628 |
| C5-3 | 199.91 | 21.79 | 0.10899905  | D5-3 | 199.91 | 65.18 | 0.326046721 |

**Table S2** The Extraction yield of soy(S), cheonggukjang(C), meju(M), doenjang(D) samples

| NO.                  | Tentative identification | UHPLC-LTQ-Orbitrap-MS/MS |                    |                    |      |                    |             |                                                         |           |     |
|----------------------|--------------------------|--------------------------|--------------------|--------------------|------|--------------------|-------------|---------------------------------------------------------|-----------|-----|
|                      |                          | RT(min)                  | [M-H] <sup>-</sup> | [M+H] <sup>+</sup> | MW   | [M-H] <sup>-</sup> |             |                                                         | VIP       | ID  |
|                      |                          |                          |                    |                    |      | Formula            | Error (ppm) | MS fragment ion                                         |           |     |
| isoflavone           |                          |                          |                    |                    |      |                    |             |                                                         |           |     |
| 1                    | Daidzin                  | 4.5                      | 415.1043           | 417.1215           | 416  | C21 H20 O9         | 12.5        | 415.10>253.23>223.08>195.08                             | VIP > 0.7 | [1] |
| 2                    | Glycitin                 | 4.64                     | 445.1154           | 447.1321           | 446  | C22 H22 O10        | 2.539       | 445.12>283.08>268.06                                    | VIP > 0.7 | [1] |
| 3                    | Genistin                 | 5.01                     | 431.0988           | 433.1166           | 442  | C21 H20 O10        | 1.74        | 431.10>268.27>224.05>180.15,194.99,167.19               | VIP > 0.7 | [1] |
| 4                    | Malonyl daidzin          | 5.03                     | 501.0982           | 503.1225           | 502  | C24 H22 O12        | 8.144       | 503.12>417.05,255.25>199.02>181.02                      | VIP > 0.7 | [1] |
| 5                    | Malonyl genistin         | 5.42                     | 517.1069           | 519.1169           | 518  | C24 H22 O13        | 6.902       | 519.12>433.08,271.24>215.03>196.99                      | VIP > 0.7 | [1] |
| 6                    | Malonyl glycitin         | 5.55                     | 531.1149           | 533.133            | 532  | C25 H24 O13        | 0.915       | 531.11>269.28>240.09,225.02>181.16,175.98               | VIP > 0.7 | [1] |
| 7                    | Acetyl genistin          | 5.78                     | 473.1082           | 475.1267           | 474  | C23 H22 O11        | -1.553      | 473.11>268.24>239.01>211.03                             | VIP > 0.7 | [1] |
| 8                    | Daidzein                 | 5.82                     | 253.0502           | 255.067            | 254  | C15 H10 O4         | -1.51       | 253.05>209.08>165.17                                    | VIP > 0.7 | [1] |
| 9                    | Glycitein                | 5.95                     | 283.0616           | 285.078            | 284  | C16 H12 O5         | 1.248       | 283.06>268.24>240.03>196.06,184.05,211.07,147.05        | VIP > 0.7 | [1] |
| 10                   | Genistein                | 6.46                     | 269.0452           | 271.062            | 270  | C15 H10 O5         | -1.177      | 271.06>152.96>66.90,69.01,108.99                        | VIP > 0.7 | [1] |
| soyasaponin          |                          |                          |                    |                    |      |                    |             |                                                         |           |     |
| 11                   | Soyasaponin I            | 7.18                     | 941.5082           | 943.5333           | 942  | C48 H78 O18        | -2.636      | 941.51>923.59>879.59>733.56,571.60,457.54               | VIP > 0.7 | [1] |
| 12                   | Soyasaponin II           | 7.31                     | 911.498            | 913.5225           | 912  | C47 H76 O17        | -3.274      | 911.50>615.49>457.41                                    | VIP > 0.7 | [1] |
| 14                   | Soyasaponin III          | 7.34                     | 795.4521           | 797.4737           | 796  | C42 H68 O14        | -1.634      | 795.45>615.40>457.44                                    | VIP > 0.7 | [1] |
| 15                   | Soyasaponin IV           | 7.45                     | 765.4425           | 767.4638           | 766  | C53 H87 O24        | -1.691      | 765.44>615.48>457.4>437.41,409.46                       | VIP > 0.7 | [1] |
| 16                   | Soyasaponin αg           | 7.5                      | 1083.5344          | 1085.5602          | 1084 | C54 H84 O22        | 2.406       | 1083.66>504.55>279.38                                   | VIP > 0.7 | [2] |
| 17                   | Soyasaponin βg           | 7.57                     | 1067.5377          | 1069.5653          | 1068 | C54 H84 O21        | -1.258      | 1067.54>967.64>821.60                                   | VIP > 0.7 | [2] |
| amino acid & peptide |                          |                          |                    |                    |      |                    |             |                                                         |           |     |
| 18                   | Valine                   | 0.92                     | 116.0724           | 118.0871           | 117  | C5 H11 N O2        | 7.154       | 116.04>99.14,88.13,73.09                                | VIP > 0.7 | [3] |
| 19                   | Phenylalanine            | 1.3                      | 164.0722           | 166.0873           | 165  | C9H11NO2           | 3.341       | 164.07>147.24>103.06                                    | VIP > 0.7 | [3] |
| 20                   | Fructose-phenylalanine   | 1.29                     | 326.1268           | 328.1414           | 327  | C15 H21 N O7       | 7.075       | 326.13>278.11,236.13>260.11,164.10>147.01,112.08        | VIP > 0.7 | [4] |
| 21                   | Glycyl-Phenylalanine     | 2.07                     | 221.0938           | 223.1095           | 222  | C11H14N2O3         | 2.869       | 221.09>164.06>147.04>103.13                             | VIP > 0.7 | [4] |
| 22                   | Acetylleucine            | 4.41                     | 172.0985           | 174.114            | 173  | C8 H15 N O3        | 8.788       | 172.10>130.09>112.16,84.21                              | VIP > 0.7 | [3] |
| 23                   | Acetylphenylalanine      | 4.76                     | 206.0827           | 208.0985           | 207  | C11 H13 N O3       | 7.425       | 206.08>164.28>146.98>103.05                             | VIP > 0.7 | [3] |
| lipid & fatty acid   |                          |                          |                    |                    |      |                    |             |                                                         |           |     |
| 24                   | Linoleic acid            | 9.2                      | 279.2337           | 281.2498           | 280  | C18 H32 O2         | 8.154       | 279.23>261.21>243.26>130.03                             | VIP > 0.7 | [5] |
| 25                   | Colneleic acid           | 9.25                     | 293.213            | 295.2289           | 294  | C18 H30 O3         | 7.21        | 293.21>275.21,245.20,249.24>231.24,161.14,133.16,113.09 | VIP > 0.7 | [6] |
| 26                   | Oleamide                 | 10.83                    | 280.2366           | 282.2805           | 281  | C18 H36 N O        | -0.663      | (+) 282.28>265.43>247.19>149.08,163.10,135.04           | VIP > 0.7 | [7] |

|            |                   |       |          |          |     |                |        |                                                          |           |      |
|------------|-------------------|-------|----------|----------|-----|----------------|--------|----------------------------------------------------------|-----------|------|
| 27         | LysoPC(18:2/0:0)  | 8.52  | 564.3299 | 520.3425 | 519 | C26 H50 N O7 P | 5.255  | (+)520.34>502.38,184.25>443.20,86.06>307.21,162.95,71.12 | VIP < 0.7 | [8]  |
| 28         | LysoPE(18:2/0:0)  | 8.44  | 476.278  | 478.2962 | 477 | C23 H44 N O7 P | -0.551 | 476.28>279.47>261.28>243.21                              | VIP < 0.7 | [8]  |
| 29         | LysoPE(16:0/0:0)  | 8.72  | 452.2786 | 454.2962 | 453 | C21 H44 N O7 P | 0.746  | 452.28>378.31,255.41,152.98>237.22,140.11>183.25,79.02   | VIP < 0.7 | [8]  |
| 30         | LysoPC(18:2/18:2) | 11.46 | -        | 782.5725 | 781 | C44 H80 N O8 P | 3.921  | 782.57>520.30>502.29>443.17                              | VIP < 0.7 | [8]  |
| <i>etc</i> |                   |       |          |          |     |                |        |                                                          |           |      |
| 31         | Trehalose         | 1.22  | 341.1091 | 343.1258 | 342 | C12 H22 O11    | 0.573  | 341.11>179.03>143.00                                     | VIP > 0.7 | [9]  |
| 32         | Galactinol        | 0.89  | 341.1095 | 343.0932 | 342 | C12 H22 O11    | 1.657  | 341.11>179.03,161.02>143.00>115.10                       | VIP > 0.7 | [10] |
| 33         | Shikimic acid     | 0.88  | 175.059  | 173.0461 | 174 | C7 H10 O5      | -6.048 | 173.01>129.01>85.05                                      | VIP > 0.7 | [11] |

**Table S3** Discriminative metabolites in soy, choenggukjang, meju, doenjang derived from the PLS-DA model of the UHPLC-LTQ-orbitrap-MS analysis.  
RT; Retention time

| No.                                   | Ret(min) <sup>a</sup> | Metabolites <sup>b</sup> | Unique Mass (m/z) | MS Fragment pattern (m/z)               | TMS | Identification <sup>c</sup> |
|---------------------------------------|-----------------------|--------------------------|-------------------|-----------------------------------------|-----|-----------------------------|
| <i>Amino acids &amp; amine, amide</i> |                       |                          |                   |                                         |     |                             |
| 1                                     | 5.17                  | Valine                   | 72                | 72,55,75,73,74,146,56,130,103,156       | 1   | Lib/STD                     |
| 2                                     | 5.31                  | Alanine                  | 116               | 116,73,147,117,59,74,75,100,103,118     | 2   | Lib/STD                     |
| 3                                     | 5.88                  | Leucine                  | 86                | 86,75,73,74,87,103,146,61,188,130       | 1   | Lib/STD                     |
| 4                                     | 6.47                  | Acetamide                | 110               | 73,110,228,134,77,184,69,75,58,74       | 1   | Lib/MS                      |
| 5                                     | 7.27                  | Isoleucine               | 158               | 73,158,100,218,147,159,74,59,75,86      | 2   | Lib/STD                     |
| 6                                     | 7.32                  | Proline                  | 142               | 142,73,70,143,147,74,59,66,144,72       | 2   | Lib/STD                     |
| 7                                     | 7.40                  | Glycine                  | 174               | 73,174,86,147,100,59,133,175,248,74     | 3   | Lib/STD                     |
| 8                                     | 7.90                  | Serine                   | 204               | 73,100,188,147,59,204,114,133,218,74    | 3   | Lib/STD                     |
| 9                                     | 8.15                  | Threonine                | 219               | 73,117,59,101,219,218,147,100,75,74     | 3   | Lib/STD                     |
| 10                                    | 8.46                  | Aspartic acid            | 160               | 73,160,75,130,117,116,74,147,70,100     | 2   | Lib/STD                     |
| 11                                    | 9.55                  | Phenylalanine            | 120               | 120,146,73,75,130,91,103,74,77,121      | 1   | Lib/STD                     |
| 12                                    | 10.07                 | Glutamic acid            | 128               | 73,128,246,84,75,147,156,56,100,74      | 3   | Lib/STD                     |
| 13                                    | 10.98                 | Putrescine               | 174               | 174,73,86,59,175,100,176,74,130,214     | 4   | Lib/MS                      |
| 14                                    | 11.55                 | Ornithine                | 142               | 73,142,174,147,86,74,59,100,143,75      | 4   | Lib/MS                      |
| 15                                    | 12.25                 | Lysine                   | 156               | 73,156,174,128,59,86,100,74,147,230     | 4   | Lib/STD                     |
| <i>Carbohydrates</i>                  |                       |                          |                   |                                         |     |                             |
| 16                                    | 7.08                  | Glycerol                 | 218               | 73,147,117,103,133,218,205,148,129,59   | 3   | Lib/STD                     |
| 17                                    | 11.75                 | Pinitol                  | 217               | 73,217,147,260,191,133,159,318,207,129  | 5   | Lib/MS                      |
| 18                                    | 12.20                 | Glucose                  | 160               | 147,160,205,217,157,129,319,229,148,189 | 5   | Lib/STD                     |
| 19                                    | 12.58                 | Myo-inositol             | 318               | 73,147,217,45,191,129,103,74,133,75     | 6   | Lib/STD                     |
| 20                                    | 13.39                 | N-Acetyl-glucosamine     | 87                | 73,147,129,87,202,117,75,103,205,173    | 4   | Lib/STD                     |
| <i>Organic acids</i>                  |                       |                          |                   |                                         |     |                             |
| 21                                    | 5.75                  | Propanoic acid           | 177               | 147,73,75,177,148,219,55,101,59,149     | 2   | Lib/MS                      |
| 22                                    | 6.39                  | Malonic acid             | 147               | 147,73,75,148,66,149,74,72,59,233       | 2   | Lib/STD                     |
| 23                                    | 7.44                  | Succinic acid            | 247               | 147,73,75,148,55,56,247,149,129,172     | 2   | Lib/MS                      |
| 24                                    | 9.02                  | Malic acid               | 147               | 73,147,75,55,133,74,101,233,148,59      | 3   | Lib/STD                     |
| 25                                    | 9.65                  | Threonic acid            | 292               | 73,147,117,103,102,130,292,74,220,55    | 4   | Lib/MS                      |
| 26                                    | 9.71                  | Glutaric acid            | 129               | 129,73,147,75,85,247,157,203,133,149    | 3   | Lib/MS                      |
| 27                                    | 11.19                 | Phosphoric acid          | 299               | 73,299,147,75,101,103,357,133,59,129    | 4   | Lib/STD                     |
| 28                                    | 11.36                 | Ribonic acid             | 292               | 73,147,103,217,292,74,117,133,189,148   | 5   | Lib/MS                      |

|                    |       |                          |     |                                       |   |         |
|--------------------|-------|--------------------------|-----|---------------------------------------|---|---------|
| 29                 | 11.6  | Citric acid              | 211 | 73,147,211,183,273,75,67,375,74,149   | 4 | Lib/STD |
| 30                 | 12.89 | gluconic acid            | 333 | 73,147,103,217,205,292,129,117,74,133 | 5 | Lib/STD |
| <i>Lipids</i>      |       |                          |     |                                       |   |         |
| 31                 | 11.68 | Myristic acid            | 132 | 75,117,132,129,55,145,285,59,76,95    | 1 | Lib/MS  |
| 32                 | 12.98 | Palmitic acid            | 117 | 73,75,117,43,132,41,129,55,313,145    | 1 | Lib/MS  |
| 33                 | 14.02 | Linoleic acid            | 337 | 75,73,67,81,129,55,337,95,117,79      | 1 | Lib/STD |
| 34                 | 15.15 | Oleamide                 | 128 | 75,73,131,55,116,128,144,54,74,69     | 1 | Lib/STD |
| <i>Nucleotides</i> |       |                          |     |                                       |   |         |
| 35                 | 7.12  | Adenosine-5'-diphosphate | 133 | 93,133,299,193,74,211,207,135,191,75  | 3 | Lib/STD |
| 36                 | 7.72  | Uracil                   | 99  | 99,241,255,126,113,256,100,73,242,131 | 2 | Lib/STD |
| 37                 | 8.29  | Thymine                  | 255 | 255,113,73,147,59,270,120,256,140,100 | 2 | Lib/MS  |
| 38                 | 16.41 | Adenosine                | 230 | 73,45,236,230,103,74,75,147,192,245   | 4 | Lib/STD |
| <i>Etc.</i>        |       |                          |     |                                       |   |         |
| 39                 | 6.78  | Urea                     | 171 | 147,171,73,189,99,74,148,66,100,75    | 2 | Lib/MS  |
| 40                 | 15.23 | Cyanide                  | 84  | 84,73,85,86,74,99,75,100,87           | 1 | Lib/MS  |

**Table S4** Discriminative metabolites in soy, choenggukjang, meju, doenjang derived from the PLS-DA model of the GC-TOF-MS analysis. <sup>a</sup> Retention time; <sup>b</sup> Metabolites were selected and identified based on VIP > 0.7 and p-value <0.05 in both VIP1 and VIP2 by PLS-DA; <sup>c</sup> Identification: STD, mass fragment pattern was consistent with those of commercial standard compounds; MS, mass fragment pattern was consistent with those of NIST and in-house libraries

| No.             | Sample | Ret(min) | Metabolites             | Unique Mass (m/z) | MS Fragment pattern (m/z)      | CAS        | Formula | Weight | Identification |
|-----------------|--------|----------|-------------------------|-------------------|--------------------------------|------------|---------|--------|----------------|
| <i>Acids</i>    |        |          |                         |                   |                                |            |         |        |                |
| 1               | all    | 1.235    | Carbamic acid           | 44                | 44,40,147,45,66,73,148,46      | 1111-78-0  | CH6N2O2 | 78     | Lib/MS         |
| 2               | C      | 19.0017  | Acetic acid             | 60                | 45,43,60,44,42,41,40,61,46,47  | 64-19-7    | C2H4O2  | 60     | Lib/STD        |
| 3               | D      | 21.23    | Propanoic acid          | 74                | 44,45,74,73,57,56,55,46,42,43  | 1979-09-04 | C3H6O2  | 74     | Lib/STD        |
| 4               | C,M,D  | 21.8033  | 2-methylpropanoic acid  | 73                | 43,41,73,44,39,42,45,88,40,55  | 79-31-2    | C4H8O2  | 88     | Lib/MS         |
| 5               | M,D    | 22.9883  | Butanoic acid           | 60                | 60,44,73,39,45,42,43,55,38,40  | 107-92-6   | C4H8O2  | 88     | Lib/STD        |
| 6               | C,M    | 23.7017  | 2-Methylbutanoic acid   | 74                | 74,41,57,39,60,45,87,44,73,43  | 116-53-0   | C5H10O2 | 102    | Lib/MS         |
| 7               | C,M    | 23.7133  | 3-Methylbutanoic acid   | 60                | 60,43,41,45,42,39,87,61,44,69  | 503-74-2   | C5H10O2 | 102    | Lib/MS         |
| 8               | C,D    | 25.7533  | 3-Methyl-2-butenic acid | 100               | 100,39,82,85,55,44,83,43,41,54 | 541-47-9   | C5H8O2  | 100    | Lib/MS         |
| 9               | C,D    | 24.8617  | Pentanoic acid          | 60                | 60,73,41,39,42,45,56,55,61,40  | 109-52-4   | C5H10O2 | 102    | Lib/STD        |
| 10              | C,D    | 25.8383  | 4-Methylpentanoic acid  | 74                | 57,41,73,74,43,55,60,44,39,42  | 646-07-1   | C6H12O2 | 116    | Lib/MS         |
| 11              | M,D    | 26.4467  | Hexanoic acid           | 60                | 60,73,41,42,43,45,39,44,55,61  | 142-62-1   | C6H12O2 | 116    | Lib/MS         |
| 12              | C,D    | 27.545   | 4-Methylhexanoic acid   | 73                | 73,55,41,43,71,74,60,44,39,83  | 52745-93-4 | C7H14O2 | 130    | Lib/MS         |
| 13              | C,D    | 29.2583  | Octanoic acid           | 60                | 60,73,43,41,55,44,39,61,101,42 | 124-07-2   | C8H16O2 | 144    | Lib/MS         |
| 14              | C,M,D  | 30.5183  | Nonanoic acid           | 60                | 60,73,41,57,43,55,44,115,39,61 | 112-05-0   | C9H18O2 | 158    | Lib/MS         |
| <i>Alcohols</i> |        |          |                         |                   |                                |            |         |        |                |
| 15              | S,C,M  | 2.16     | 2-Methyl-2-propanol     | 59                | 59,41,43,39,57,56,42,60,55,40  | 75-65-0    | C4H10O  | 74     | Lib/MS         |
| 16              | S,D    | 2.40833  | 2-Propanol              | 45                | 45,43,41,39,44,42,59,46,38,40  | 67-63-0    | C3H8O   | 60     | Lib/MS         |
| 17              | D      | 3.75167  | 2-Butanol               | 45                | 45,41,59,43,44,39,55,56,42,57  | 14898-79-4 | C4H10O  | 74     | Lib/MS         |
| 18              | C,D    | 4.06833  | 1-Propanol              | 60                | 42,59,41,60,39,43,40,38,57,58  | 71-23-8    | C3H8O   | 60     | Lib/MS         |
| 19              | D      | 5.85     | 2-Methyl-1-propanol     | 42                | 41,43,42,39,56,40,38,74,55,37  | 78-83-1    | C4H10O  | 74     | Lib/MS         |
| 20              | D      | 7.71     | 1-Butanol               | 56                | 41,56,43,42,39,55,44,40,57,45  | 71-36-3    | C4H10O  | 74     | Lib/MS         |
| 21              | C      | 10.1467  | 3-Methyl-1-butanol      | 55                | 55,42,41,43,39,70,45,44,57,46  | 123-51-3   | C5H12O  | 88     | Lib/MS         |
| 22              | C      | 9.745    | 3-Methyl-2-pentanol     | 45                | 45,41,44,56,43,39,55,57,69,42  | 565-60-6   | C6H14O  | 102    | Lib/MS         |
| 23              | S,M    | 11.7717  | 1-Pentanol              | 42                | 44,39,77,43,46,38,338,57,56,55 | 71-41-0    | C5H12O  | 88     | Lib/MS         |
| 24              | C      | 14.4233  | 3-Methyl-2-buten-1-ol   | 71                | 71,39,41,53,67,68,86,65,55,54  | 556-82-1   | C5H10O  | 86     | Lib/MS         |



|               |       |         |                           |     |                                  |            |         |     |        |
|---------------|-------|---------|---------------------------|-----|----------------------------------|------------|---------|-----|--------|
| 25            | S,M   | 15.5117 | 1-Hexanol                 | 56  | 56,41,55,43,42,39,69,57,53,40    | 111-27-3   | C6H14O  | 102 | Lib/MS |
| 26            | S     | 16.9533 | 3-Octanol                 | 83  | 59,55,41,83,43,57,58,101,42,39   | 589-98-0   | C8H18O  | 130 | Lib/MS |
| 27            | all   | 18.8333 | 1-Octen-3-ol              | 57  | 57,43,41,72,55,39,58,42,54,67    | 3391-86-4  | C8H16O  | 128 | Lib/MS |
| 28            | S     | 19.81   | Octa-1,5-dien-3-ol        | 57  | 57,55,70,39,53,58,68,79,69,41    | 50306-18-8 | C8H14O  | 126 | Lib/MS |
| 29            | C,M   | 19.93   | 2-Ethylhexanol            | 57  | 57,41,43,55,56,70,83,39,42,69    | 104-76-7   | C8H18O  | 130 | Lib/MS |
| 30            | C,M   | 22      | 2,3-Butanediol            | 45  | 45,43,44,57,47,42,46,41,55,75    | 513-85-9   | C4H10O2 | 90  | Lib/MS |
| 31            | M     | 22.5033 | Cyclohept-4-enol          | 79  | 79,67,39,94,41,77,53,58,55,66    | 38607-27-1 | C7H12O  | 112 | Lib/MS |
| 32            | D     | 24.4467 | 3-(Methylthio)-1-propanol | 61  | 61,57,73,41,47,59,46,58,60,106   | 505-10-2   | C4H10OS | 106 | Lib/MS |
| 33            | C,M,D | 26.8567 | Benzyl alcohol            | 108 | 79,108,77,107,51,39,50,91,78,105 | 100-51-6   | C7H8O   | 108 | Lib/MS |
| 34            | C,M,D | 27.3183 | Phenylethyl Alcohol       | 91  | 91,92,65,122,39,51,77,63,78,50   | 1960-12-08 | C8H10O  | 122 | Lib/MS |
| 35            | C,M,D | 28.0783 | Maltol                    | 126 | 126,71,43,55,42,97,44,69,53,54   | 118-71-8   | C6H6O3  | 126 | Lib/MS |
| <i>Esters</i> |       |         |                           |     |                                  |            |         |     |        |
| 36            | C     | 1.25667 | Methyl formate            | 60  | 60,77,131,61,52,36,62,58,105,259 | 107-31-3   | C2H4O2  | 60  | Lib/MS |
| 37            | S,C   | 1.42    | Vinyl formate             | 43  | 44,40,43,147,42,59,41,73,45,66   | 692-45-5   | C3H4O2  | 72  | Lib/MS |
| 38            | C     | 1.53833 | Butyl propionate          | 56  | 57,56,75,39,58                   | 590-01-2   | C7H14O2 | 130 | Lib/MS |
| 39            | C,M,D | 1.76833 | Methyl acetate            | 74  | 43,74,42,59,44,41,45,75,58,73    | 79-20-9    | C3H6O2  | 74  | Lib/MS |
| 40            | all   | 2.08167 | Ethyl Acetate             | 73  | 43,45,61,70,42,44,73,88,60,41    | 141-78-6   | C4H8O2  | 88  | Lib/MS |
| 41            | C,D   | 2.36    | Methyl-2-methylpropanoate | 87  | 43,71,41,44,59,87,42,39,55,102   | 547-63-7   | C5H10O2 | 102 | Lib/MS |
| 42            | C,D   | 2.83167 | Ethyl 2-methylpropionate  | 71  | 43,71,41,45,88,42,44,73,39,116   | 97-62-1    | C6H12O2 | 116 | Lib/MS |
| 43            | C,D   | 2.945   | Propyl acetate            | 61  | 43,61,73,42,41,44,39,59,40,57,72 | 109-60-4   | C5H10O2 | 102 | Lib/MS |
| 44            | D     | 3.095   | Methyl butyrate           | 74  | 74,43,71,59,41,42,87,39,55,45    | 623-42-7   | C5H10O2 | 102 | Lib/MS |
| 45            | C,D   | 3.465   | Methyl 2-methylbutyrate   | 88  | 41,40,88,57,39,59,85,38,56,101   | 868-57-5   | C6H12O2 | 116 | Lib/MS |
| 46            | C,D   | 3.655   | Methyl 3-methylbutanoate  | 74  | 74,43,59,41,85,39,57,42,101,69   | 556-24-1   | C6H12O2 | 116 | Lib/MS |
| 47            | D     | 4.00333 | Ethyl butyrate            | 71  | 71,43,88,41,60,73,45,42,91,39    | 105-54-4   | C6H12O2 | 116 | Lib/MS |
| 48            | C,D   | 4.36833 | Ethyl 2-methyl butanoate  | 57  | 57,41,102,85,74,87,56,45,39,55   | 7452-79-1  | C7H14O2 | 130 | Lib/MS |
| 49            | C,D   | 4.78333 | Ethyl 3-methyl butanoate  | 88  | 88,60,85,41,57,43,61,70,39,44    | 108-64-5   | C7H14O2 | 130 | Lib/MS |
| 50            | D     | 4.895   | Butyl acetate             | 43  | 43,56,41,73,61,39,42,55,57,58    | 123-86-4   | C6H12O2 | 116 | Lib/MS |
| 51            | D     | 6.52833 | Isoamyl acetate           | 61  | 43,55,70,41,42,44,61,39,73,87    | 123-92-2   | C7H14O2 | 130 | Lib/MS |
| 52            | M     | 9.04    | Methyl hexanoate          | 74  | 74,43,44,59,87,41,42,39,55,99    | 106-70-7   | C7H14O2 | 130 | Lib/MS |

|           |       |         |                                         |     |                                     |            |          |     |        |
|-----------|-------|---------|-----------------------------------------|-----|-------------------------------------|------------|----------|-----|--------|
| 53        | D     | 11.525  | Butyl 3-methyl butanoate                | 85  | 41,85,56,57,103,60,39,43,44,87      | 109-19-3   | C9H18O2  | 158 | Lib/MS |
| 54        | D     | 10.8067 | Butyl 2-methylbutanoate                 | 85  | 57,41,103,85,56,74,44,39,43,55      | 15706-73-7 | C9H18O2  | 158 | Lib/MS |
| 55        | C     | 16.6317 | Methyl octanoate                        | 74  | 74,43,87,41,55,59,57,58,115,39      | 111-11-5   | C9H18O2  | 158 | Lib/MS |
| 56        | C     | 18.1783 | Ethyl octanoate                         | 88  | 88,60,57,61,70,73,41,101,43,55      | 106-32-1   | C10H20O2 | 172 | Lib/MS |
| 57        | D     | 23.515  | Ethyl benzoate                          | 105 | 105,77,122,51,150,106,50,78,45,76   | 93-89-0    | C9H10O2  | 150 | Lib/MS |
| 58        | C,D   | 25.135  | Methyl phenylacetate                    | 91  | 91,150,65,44,39,59,63,92,89,90      | 101-41-7   | C9H10O2  | 150 | Lib/MS |
| 59        | D     | 25.525  | Ethyl phenylacetate                     | 91  | 91,65,164,92,39,89,63,51,90,105     | 101-97-3   | C10H12O2 | 164 | Lib/MS |
| 60        | D     | 25.9567 | Phenethyl acetate                       | 104 | 43,104,44,91,39,105,69,51,78,41     | 103-45-7   | C10H12O2 | 164 | Lib/MS |
| Aldehydes |       |         |                                         |     |                                     |            |          |     |        |
| 61        | C,M,D | 1.70167 | 2-Methylpropanal                        | 72  | 41,72,39,38,57,37,44,42,73,70       | 78-84-2    | C4H8O    | 72  | Lib/MS |
| 62        | C,M,D | 2.27    | 2-Methylbutanal                         | 57  | 41,57,58,39,43,55,44,42,56,75       | 96-17-3    | C5H10O   | 86  | Lib/MS |
| 63        | all   | 2.31167 | 3-Methylbutanal                         | 41  | 44,41,58,43,39,42,71,57,45,38       | 590-86-3   | C5H10O   | 86  | Lib/MS |
| 64        | D     | 2.99833 | Pentanal                                | 58  | 44,41,58,57,39,43,45,42,55,38       | 110-62-3   | C5H10O   | 86  | Lib/MS |
| 65        | S,M,D | 5.12    | Hexanal                                 | 57  | 44,41,56,57,43,39,55,42,45,72       | 66-25-1    | C6H12O   | 100 | Lib/MS |
| 66        | C,M,D | 20.5467 | Benzaldehyde                            | 106 | 77,106,105,51,50,78,52,107,74,39    | 100-52-7   | C7H6O    | 106 | Lib/MS |
| 67        | D     | 23.1433 | Benzeneacetaldehyde                     | 91  | 91,120,65,92,50,62,41,51,64,89      | 122-78-1   | C8H8O    | 120 | Lib/MS |
| 68        | D     | 27.595  | $\alpha$ -Ethylidenebenzeneacetaldehyde | 115 | 115,117,146,91,116,39,51,63,78,118  | 4411-89-6  | C10H10O  | 146 | Lib/MS |
| 69        | D     | 29.4233 | 5-Methyl-2-phenyl-2-hexenal             | 117 | 117,104,43,115,91,41,116,103,39,188 | 21834-92-4 | C13H16O  | 188 | Lib/MS |
| Ketones   |       |         |                                         |     |                                     |            |          |     |        |
| 70        | all   | 1.71833 | Acetone                                 | 58  | 43,58,42,39,38,41,37,59,57          | 67-64-1    | C3H6O    | 58  | Lib/MS |
| 71        | C,M,D | 2.17667 | 2-Butanone                              | 72  | 43,72,57,42,44,39,41,53,45,73       | 78-93-3    | C4H8O    | 72  | Lib/MS |
| 72        | S,C,D | 2.96667 | 2-Pentanone                             | 43  | 45,46,43,49,84,86,42,51,44,47       | 107-87-9   | C5H10O   | 86  | Lib/MS |
| 73        | C,M   | 3.03667 | 2,3-Butanedione                         | 43  | 43,86,42,44,41,39,75,49,87,45       | 431-03-8   | C4H6O2   | 86  | Lib/MS |
| 74        | C,M   | 8.82333 | 2-Heptanone                             | 58  | 43,58,59,41,39,42,71,72,55,57       | 110-43-0   | C7H14O   | 114 | Lib/MS |
| 75        | M,D   | 12.785  | 2-Octanone                              | 58  | 43,58,41,59,71,39,85,55,42,57       | 111-13-7   | C8H16O   | 128 | Lib/MS |
| 76        | C,M   | 12.8433 | Acetoin                                 | 45  | 45,43,42,44,88,41,46,73,55,39       | 513-86-0   | C4H8O2   | 88  | Lib/MS |
| 77        | S     | 13.4317 | 1-Octen-3-one                           | 70  | 55,70,43,41,97,39,83,42,71,56       | 4312-99-6  | C8H14O   | 126 | Lib/MS |
| 78        | M     | 14.54   | 6-Octen-2-one                           | 43  | 43,41,68,55,67,39,97,58,69,71       | 74810-53-0 | C8H14O   | 126 | Lib/MS |
| 79        | D     | 22.2717 | 2-Undecanone                            | 58  | 58,43,71,59,57,51,69,55,77,91       | 112-12-9   | C11H22O  | 170 | Lib/MS |

|                              |       |         |                                |     |                                   |            |          |     |        |
|------------------------------|-------|---------|--------------------------------|-----|-----------------------------------|------------|----------|-----|--------|
| 80                           | M     | 23.2267 | Acetophenone                   | 105 | 105,77,51,120,43,50,78,106,74,38  | 98-86-2    | C8H8O    | 120 | Lib/MS |
| 81                           | M,D   | 24.5783 | Phenylacetone                  | 91  | 43,91,92,65,134,39,63,51,89,41    | 103-79-7   | C9H10O   | 134 | Lib/MS |
| <i>Alkanes &amp; Alkenes</i> |       |         |                                |     |                                   |            |          |     |        |
| 82                           | M     | 1.25667 | Isopentane                     | 56  | 41,39,56,42,43,57,55,50,53,51     | 78-78-4    | C5H12    | 72  | Lib/MS |
| 83                           | C,M,D | 1.39    | 2-Methoxy-2-methylpropane      | 73  | 73,41,43,57,147,39,56,45,55,42    | 1634-04-4  | C5H12O   | 88  | Lib/MS |
| 84                           | C     | 1.42833 | 2-ethoxy-2-methylpropane       | 87  | 59,57,87,147,60,88,148,131,103    | 637-92-3   | C6H14O   | 102 | Lib/MS |
| 85                           | D     | 1.63    | Octane                         | 41  | 43,41,57,39,42,56,85,71,55,58     | 111-65-9   | C8H18    | 114 | Lib/MS |
| 86                           | M     | 20.0767 | 1-Nitro-hexane                 | 55  | 43,41,55,39,42,57,62,59,56,45     | 646-14-0   | C6H13NO2 | 131 | Lib/MS |
| 87                           | C     | 1.36    | 2-Methyl-1-pentene             | 84  | 41,56,39,55,42,69,84,53,67,43     | 763-29-1   | C6H12    | 84  | Lib/MS |
| 88                           | M,D   | 2.025   | 2,4-Dimethyl-1-heptene         | 55  | 43,70,41,55,56,57,39,42,69,71     | 19549-87-2 | C9H18    | 126 | Lib/MS |
| <i>Aromatic compounds</i>    |       |         |                                |     |                                   |            |          |     |        |
| 89                           | C,M   | 4.005   | Toluene                        | 65  | 91,92,65,39,63,51,45,50,89,93     | 108-88-3   | C7H8     | 92  | Lib/MS |
| 90                           | M     | 6.275   | Ethylbenzene                   | 91  | 91,106,51,65,77,39,78,92,50,63    | 100-41-4   | C8H10    | 106 | Lib/MS |
| 91                           | D     | 22.3467 | Benzonitrile                   | 103 | 103,76,50,51,75,104,77,52,39,38   | 100-47-0   | C7H5N    | 103 | Lib/MS |
| 92                           | D     | 22.69   | Methyl benzoate                | 105 | 105,77,136,51,50,106,81,78,39,76  | 93-58-3    | C8H8O2   | 136 | Lib/MS |
| 93                           | M,D   | 23.7533 | 1-ethenyl-4-methoxybenzene     | 134 | 134,119,91,65,38,51,63,77,135,75  | 637-69-4   | C9H10O   | 134 | Lib/MS |
| 94                           | D     | 28.035  | 1,2,3-Trimethoxybenzene        | 168 | 44,168,153,93,110,39,95,125,65,41 | 634-36-6   | C9H12O3  | 168 | Lib/MS |
| 95                           | M,D   | 28.1583 | 2-Acetylpyrrole                | 94  | 94,109,66,39,43,38,40,53,37,110   | 1072-83-9  | C6H7NO   | 109 | Lib/MS |
| 96                           | M     | 28.9783 | 4-ethenyl-1,2-dimethoxybenzene | 164 | 164,77,91,149,103,78,121,65,51,50 | 6380-23-0  | C10H12O2 | 164 | Lib/MS |
| 97                           | M     | 33.8333 | 1H-Indole                      | 117 | 117,90,89,63,116,118,62,39,64,38  | 120-72-9   | C8H7N    | 117 | Lib/MS |
| <i>Furans</i>                |       |         |                                |     |                                   |            |          |     |        |
| 98                           | D     | 1.64167 | Furan                          | 68  | 39,68,38,37,42,147,69,36,45,67    | 110-00-9   | C4H4O    | 68  | Lib/MS |
| 99                           | D     | 1.975   | 2-Methylfuran                  | 82  | 82,81,53,39,51,50,43,54,38,41     | 534-22-5   | C5H6O    | 82  | Lib/MS |
| 100                          | C,D   | 2.14    | 3-Methylfuran                  | 82  | 82,81,53,39,50,54,51,38,83,37     | 930-27-8   | C5H6O    | 82  | Lib/MS |
| 101                          | D     | 2.67    | 2,5-Dimethylfuran              | 96  | 96,95,53,81,43,50,39,67,41,97     | 625-86-5   | C6H8O    | 96  | Lib/MS |
| 102                          | S,C   | 2.67333 | 2-Ethylfuran                   | 81  | 45,46,49,43,84,86,42,51,44,47     | 3208-16-0  | C6H8O    | 96  | Lib/MS |
| 103                          | C,M,D | 10.6683 | 2-Pentylfuran                  | 81  | 81,82,53,138,41,39,95,94,67,68    | 3777-69-3  | C9H14O   | 138 | Lib/MS |
| 104                          | D     | 20.2567 | 2-Acetylfuran                  | 110 | 95,110,39,43,67,96,41,38,37,51    | 1192-62-7  | C6H6O2   | 110 | Lib/MS |
| 105                          | C,M,D | 23.5983 | 2-Furanmethanol                | 98  | 98,41,39,42,97,81,53,69,70,38     | 98-00-0    | C5H6O2   | 98  | Lib/MS |

|                         |       |         |                                 |     |                                   |            |          |     |         |
|-------------------------|-------|---------|---------------------------------|-----|-----------------------------------|------------|----------|-----|---------|
| 106                     | M,D   | 24.135  | 5-Ethylidihydro-2(3H)-furanone  | 85  | 85,41,57,56,42,39,55,86,40,43     | 695-06-7   | C6H10O2  | 114 | Lib/MS  |
| <i>Phenols</i>          |       |         |                                 |     |                                   |            |          |     |         |
| 107                     | C,M,D | 26.64   | 2-Methoxyphenol                 | 109 | 109,124,81,53,39,51,52,110,50,63  | 1990-05-01 | C7H8O2   | 124 | Lib/MS  |
| 108                     | C,M,D | 28.6    | Phenol                          | 94  | 94,66,65,39,40,55,38,47,63,95     | 108-95-2   | C6H6O    | 94  | Lib/MS  |
| 109                     | D     | 28.8883 | 4-Ethyl-2-methoxyphenol         | 137 | 137,152,122,39,91,77,138,51,94,65 | 2785-89-9  | C9H12O2  | 152 | Lib/MS  |
| 110                     | D     | 30.6517 | 4-Ethylphenol                   | 107 | 107,122,77,39,108,51,53,91,65,63  | 123-07-9   | C8H10O   | 122 | Lib/MS  |
| 111                     | C,M   | 30.8983 | 2-Methoxy-4-vinylphenol         | 135 | 135,150,77,107,39,51,79,78,151,50 | 7786-61-0  | C9H10O2  | 150 | Lib/MS  |
| <i>Pyrazines</i>        |       |         |                                 |     |                                   |            |          |     |         |
| 112                     | M     | 12.07   | methyl pyrazine                 | 94  | 94,67,40,39,53,42,41,38,52,37     | 109-08-0   | C5H6N2   | 94  | Lib/MS  |
| 113                     | C,M,D | 14.0883 | 2,5-Dimethylpyrazine            | 108 | 42,108,39,40,81,38,41,52,109,37   | 123-32-0   | C6H8N2   | 108 | Lib/MS  |
| 114                     | C,M,D | 14.31   | 2,6-Dimethylpyrazine            | 108 | 108,42,40,39,41,38,81,66,52,109   | 108-50-9   | C6H8N2   | 108 | Lib/MS  |
| 115                     | C,M,D | 14.9433 | 2,3-Dimethylpyrazine            | 108 | 67,108,40,42,41,39,52,51,38,109   | 5910-89-4  | C6H8N2   | 108 | Lib/MS  |
| 116                     | C,M,D | 16.2833 | 2-Ethyl-6-methylpyrazine        | 121 | 121,122,44,39,40,94,56,66,42,53   | 13925-03-6 | C7H10N2  | 122 | Lib/MS  |
| 117                     | C,M,D | 16.9433 | Trimethylpyrazine               | 122 | 42,122,39,81,40,54,53,41,52,38    | 14667-55-1 | C7H10N2  | 122 | Lib/MS  |
| 118                     | C,M,D | 18.3167 | 3-Ethyl-2,5-dimethylpyrazine    | 135 | 135,136,42,39,56,108,107,40,41,53 | 13360-65-1 | C8H12N2  | 136 | Lib/MS  |
| 119                     | C,M,D | 19.2483 | Tetramethylpyrazine             | 136 | 54,42,136,39,53,52,51,41,55,60    | 1124-11-4  | C8H12N2  | 136 | Lib/MS  |
| 120                     | M     | 19.695  | 2-Ethenyl-6-methylpyrazine      | 120 | 120,52,39,119,54,51,94,50,121,42  | 13925-09-2 | C7H8N2   | 120 | Lib/MS  |
| 121                     | C,M,D | 20.2983 | 2,3,5-Trimethyl-6-ethylpyrazine | 149 | 149,150,42,53,39,54,67,122,41,121 | 17398-16-2 | C9H14N2  | 150 | Lib/MS  |
| 122                     | M,D   | 21.8617 | trimethyl propyl pyrazine       | 136 | 136,149,135,53,137,54,52,51,94,42 | 92233-82-4 | C10H16N2 | 164 | Lib/MS  |
| <i>Sulfur compounds</i> |       |         |                                 |     |                                   |            |          |     |         |
| 123                     | C     | 1.47667 | Carbon disulfide                | 76  | 76,78,38,77,47,39,87,117,55,64    | 75-15-0    | CS2      | 76  | Lib/MS  |
| 124                     | D     | 1.51    | Dimethyl sulfide                | 62  | 62,47,45,44,46,35,40,61,43,48     | 75-18-3    | C2H6S    | 62  | Lib/MS  |
| 125                     | D     | 4.81    | Dimethyl disulfide              | 94  | 94,45,79,46,47,48,61,96,64,44     | 624-92-0   | C2H6S2   | 94  | Lib/MS  |
| 126                     | D     | 5.30667 | 2-Methylthiophene               | 97  | 97,98,53,99,58,69,50,71,49,51     | 554-14-3   | C5H6S    | 98  | Lib/MS  |
| 127                     | D     | 15.805  | Dimethyl trisulfide             | 126 | 126,45,79,44,47,46,64,80,111,128  | 3658-80-8  | C2H6S3   | 126 | Lib/MS  |
| <i>Etc.</i>             |       |         |                                 |     |                                   |            |          |     |         |
| 128                     | S,M   | 1.33833 | Ethyl ether                     | 59  | 44,147,40,45,59,73,66,148,74,43   | 60-29-7    | C4H10O   | 74  | Lib/MS  |
| 129                     | C,M,D | 1.38333 | Methanethiol                    | 48  | 40,44,147,47,48,45,73,66,41,148   | 0-00-0     | C2H4S    | 60  | Lib/MS  |
| 130                     | all   | 2.46167 | Dichloromethane                 | 84  | 49,84,86,51,47,48,41,88,35,42     | 1975-09-02 | CH2Cl2   | 84  | Lib/STD |

|     |       |         |                             |     |                                    |            |         |     |        |
|-----|-------|---------|-----------------------------|-----|------------------------------------|------------|---------|-----|--------|
| 131 | S,C,M | 3.47    | Trimethylborane             | 41  | 41,40,39,38,42                     | 593-90-8   | C3H9B   | 56  | Lib/MS |
| 132 | M     | 3.71667 | Chloroform                  | 83  | 83,85,47,48,87,49,35,44,40,75      | 67-66-3    | CHCl3   | 118 | Lib/MS |
| 133 | M,D   | 6.69333 | 3-Methylbutanenitrile       | 41  | 41,43,39,40,42,38,68,37,55,52      | 625-28-5   | C5H9N   | 83  | Lib/MS |
| 134 | C,M   | 9.40333 | Trimethyloxazole            | 111 | 43,111,55,42,68,70,41,69,82,110    | 20662-84-4 | C6H9NO  | 111 | Lib/MS |
| 135 | D     | 24.7483 | N-(2-Methylpropyl)acetamide | 72  | 43,72,60,100,58,73,41,115,42,56    | 1540-94-9  | C6H13NO | 115 | Lib/MS |
| 136 | S,C,M | 25.31   | Methoxyphenyloxime          | 77  | 133,151,135,68,77,134,45,75,152,89 | 0-00-0     | C8H9NO2 | 151 | Lib/MS |
| 137 | D     | 27.56   | Benzyl nitrile              | 117 | 117,90,116,89,51,39,63,91,50,77    | 140-29-4   | C8H7N   | 117 | Lib/MS |

**Table S5** Discriminative metabolites in soy, choenggukjang, meju, doenjang derived from the PLS-DA model of the SPME-GC/MS analysis. <sup>a</sup> Retention time; <sup>b</sup> Metabolites were selected and identified based on VIP > 0.7 and p-value < 0.05 in both VIP1 and VIP2 by PLS-DA; <sup>c</sup> Identification: STD, mass fragment pattern was consistent with those of commercial standard compounds; MS, mass fragment pattern was consistent with those of NIST and in-house libraries (S; soy, C; cheonggukjang, M; meju, D; doenjang)
